# Supplementary material for: Interlimb and trunk asymmetry in the frontal plane of table tennis female players
Source: PeerJ. 2024 Jun 21;12:e17526. doi: 10.7717/peerj.17526 (PMC11195546; doi:10.7717/peerj.17526)
Supplement: Supplemental Information 1 [file peerj-12-17526-s001.xls]

## Sheet: dane
Group	Dominant site	Years of training	Year of birth	Age	Body mass	Body height	KNT 1	KLB[deg]	UL[deg]	OL 1	TT	TS 1	KNM[deg]	KSM[deg]	UK 1	circ. Arm. R	circ. Arm L	circ. Forearm R	circ. Forearm L	circ. Elbow R	circ. Elbow L	circ. Wrist R	circ. Wrist L	circ. Shank R	circ. Shank L	circ. Thigh R	circ. Thigh L	circ. Knee R	circ. Knee L	circ. Ankle R	circ. Ankle L
Table tennis	R	6	2005	14	50	161	2	0.4	2	4.3	1	10.3	0	3.7	1.5	26	23	23.5	21.5	24.5	22	16.5	16	45	45.5	35	34.5	35.5	34.5	23	22.5
Table tennis	R	7	2007	13	38	153	1.5	0	1.7	11.4	5.2	0	2.1	4.5	2.3	23	22.5	20.5	20	21	20	14.5	14	43	42	31.5	31	32	32.5	21	21.5
Table tennis	R	9	2003	17	55	165	2.4	2.4	6	25.3	12.4	27.9	1.1	2.1	4.9	26.5	24	23	21	23.5	22.5	15.5	15.5	50	50	36	35	34.5	35.5	22.5	22.5
Table tennis	R	7	2002	18	52	170	1	2.1	2.3	17.6	16.5	27.9	1.1	8.5	2.6	26.5	24	24	21	25.5	22.5	16.5	15.5	45.5	43.5	33	32	33	32	22.5	21.5
Table tennis	R	15	1998	21	66	171	1.7	2.2	2.7	9.3	19.6	14.5	0	0.6	3.4	27	26	22.5	21	24	23	16.5	15.5	53	53	35.5	35.5	40	37	21.5	21.5
Table tennis	R	14	1999	20	66	166	2.5	0.9	3.8	8.6	9.3	13.4	0	5.2	2.2	25	26.5	23	24.5	21.5	23.5	15	16	50	49	36	36	35	36	21	21.5
Table tennis	R	11	2000	19	73	174	1.4	0.7	2.8	39.8	4.1	23.8	1.2	5.5	3.8	28	27	25.5	23.5	27	25	17	17	53	53	38.5	39	40	39.5	26.5	26
Table tennis	R	10	2001	18	48	156	0.7	1.5	2.2	9.3	24.8	18.6	3.1	2.9	3.9	24	22	22.5	20.5	22.5	22	15.5	14	49.5	48	33	33	31	32	20	20.5
Table tennis	R	10	2001	18	54	163	1.9	0.5	5.6	5.2	5.2	8.3	1.7	1.1	7.2	24	22	24	22	24	22	15	14	51	49	35	35	34	33	22	21
Table tennis	R	4	2006	14	48	164	0.7	1.5	1.1	1	11.4	5.2	0	3	0.9	23.5	22	21	19.5	22.5	21.5	15.5	15.5	44	42.5	31.5	31	33.5	33.5	22.5	22.5
Controll	R		2003	19	78	178	1.8	1	1.9	21.9	2.4	12	4.7	5.1	2.7	26	26	20	21.5	24	23	15	15	57	57	39	37	36	36	24	24
Controll	R		2003	19	65	177	1.9	1.5	0.6	11.3	2.4	9.6	0.6	4.6	7.6	26	25	25	24	24	24	16	16	56	56	36	36	38	37	24	24
Controll	R		2003	19	64	160	2.2	3.1	4.5	4.8	0	19.2	0.6	2.2	2.2	29	30	24	25	23	23	16	15	63	61	39	38	36	36	23	23
Controll	R		2003	19	49	163	0.5	0.7	2	19.1	10.6	8.6	2	0.5	5.2	23	23	21	21	21	21	15	15	51	49	32	33	34	34	21	20
Controll	R		2005	17	59	164	1	1	2.3	3	12.5	7.7	1.8	0	3	26.5	27.5	22.5	21.5	23.5	23.5	14.5	14	48	49	46.5	46	36	36	21.5	21
Controll	R		2005	17	39	157	0.9	0.2	0.4	9.6	8.6	11.5	3.9	1	4.5	20.5	20	20	19	20.5	20.5	13	13	41	41	30	30	29	28	19	19
Controll	R		2005	17	50	168	1	2.7	2.6	1	17.3	14.4	4.1	0.6	2.7	23	23	21	20	22	22	14.5	14.5	49.5	49	36	35	31	31	21.5	21
Controll	R		2005	17	51	169	0.1	1	0	7.4	1	1	2.8	0.5	9.4	26	23	21.5	21.5	22	22	14.5	15	48	49	36	38	33.5	33.5	21.5	21.5
Controll	R		2007	15	45	161	0.8	1.1	6.2	8.5	30.3	8.6	4.5	0	7.4	22.5	22	22	21	22.5	21.5	15	14	44	43.5	32.5	33	32.5	32	21.5	21
Controll	R		2005	17	53	159	0.6	1.5	1.9	14.6	12.5	3.8	4	1.1	4.7	24	24	22	21.5	22.5	22.5	14.5	14.5	47.5	48	35	35	36	35.5	23	22.5
Controll	R		2005	17	53	159	0.7	1.3	2.3	17.4	1.4	9.6	3.3	1.6	8.3	24	24	22	21.5	22.5	22.5	14.5	14.5	47.5	48	35	35	36	35.5	23	22.5
Controll	R		2005	17	74	174	0.5	3.2	8	0.1	57.2	1.9	1.2	2.8	6.7	29.5	30	25	24.5	26	25	16	16	55	53.5	37	38	38.5	39	23.5	24
